# Supplementary material for: Distinct Responses of Gut Microbiota to Jian-Pi-Yi-Shen Decoction Are Associated With Improved Clinical Outcomes in 5/6 Nephrectomized Rats
Source: Front Pharmacol. 2020 May 6;11:604. doi: 10.3389/fphar.2020.00604 (PMC7219274; doi:10.3389/fphar.2020.00604)
Supplement: Table S1 — Herbal ingredients and propotion in JPYS. [file DataSheet_1.xlsx]

## Sheet: Table S1
Herbal name	Herbal Ingredients of each dose (g)	Species name	Batch number
Astragali Radix	30	Roots of Astragalus membranaceus (Fisch.) Bge. var. mongholicus (Bge.) Hsiao	Lot. 150621
Atractylodis Macrocephalae Rhizoma	10	Rhizomes of Atractylodes macrocephala Koidz.	Lot. 141230
Dioscoreae Rhizoma	30	Rhizomes of Dioscorea opposite Thunb.	Lot. 150615
Cistanches Herba	10	Herbs of Cistanche deserticola Y.C. Ma	Lot. 150621
Amomi Fructus Rotundus	10	Fruits of Amomum kravanh Pierre ex Gagnep	Lot. 150617
Salviae Miltiorrhizae Radix et Rhizoma	15	Roots and rhizomes of Salvia miltiorrhiza Bge	Lot. 150626
Rhei Radix et Rhizoma	10	Roots and rhizomes of Rheum palmatum L	Lot. 150104
Glycyrrhizae Radix et Rhizoma Praeparata cum Melle	6	Roots and rhizomes of Glycyrrhiza uralensis Fisch	Lot. 150615

## Sheet: Table S2
					Mean ± SD				p value
Bochemical measurements	Abbreviation	Kit	Source	Unit	CKD	JPYS	PF	Sham	JPYS vs. CKD	PF vs. CKD	Sham vs. CKD	PF vs. JPYS	Sham vs. JPYS	Sham vs. PF
Serum phosphorus（P）	Sp	Phosphate Assay Kit	Nanjing Jiancheng Bioengineering Institute	mmol/L	2.39±0.93	2.47±0.61	2.87±0.97	2.13±0.23	0.553	0.539	0.93	0.595	0.539	0.396
Serum calcium（Ca)	S-Ca	Calcium Assay Kit	Nanjing Jiancheng Bioengineering Institute	mmol/L	1.43±0.18	1.62±0.13	1.4±0.18	1.67±0.07	0.015	0.967	0.008	0.008	0.344	0.002
Serum Albumin(ALB）	S-ALB	Albumin assay kit	Nanjing Jiancheng Bioengineering Institute	g/L	17.54±1.47	18.33±1.16	17.58±0.9	19.25±2.53	0.167	0.902	0.154	0.154	0.213	0.154
Serum creatinine（Cr）	Scr	Creatinine Assay Kit	Nanjing Jiancheng Bioengineering Institute	mol/L	240.81±56.07	196.51±52.43	92.76±46.63	78.29±28.9	0.169	0.001	<0.001	0.002	<0.001	0.347
Blood urea nitrogen	BUN	Urea Assay Kit	Nanjing Jiancheng Bioengineering Institute	mmol/L	5.41±0.84	2.67±1.03	3.39±0.89	1.89±0.34	<0.001	0.001	<0.001	0.063	0.034	0.001
Alanine aminotransferase	ALT	Alanine aminotransferase Assay	Nanjing Jiancheng Bioengineering Institute	U/L	44.65±13.05	51.06±45.24	62.10±39.32	63.33±30.91	0.82	0.82	0.51	0.811	0.51	0.838
Aspartate aminotransferase	AST	Aspartate aminotransferase Assay Kit	Nanjing Jiancheng Bioengineering Institute	U/L	0.24±0.01	0.25±0.02	0.25±0.03	0.26±0.03	0.33	0.33	0.163	0.623	0.469	0.33
N-acetyl-β-D-glucosaminidase	NAG	Rat-NAG ELISA Kit	Tianjing Anoric Bio-techology CO.Itd	U/L	5.41±1.29	9.23±2.32	5.43±2.05	4.72±1.25	0.004	0.905	0.387	0.01	0.004	0.905
Parathyroid hormone	PTH	Rat-PTH ELISA Kit	Tianjing Anoric Bio-techology CO.Itd	pg/mL	234.95±32.7	183.01±25.64	225.55±49.67	264.37±19.96	0.006	0.549	0.04	0.043	0.002	0.028
Erythropoietin	EPO	Rat-EPO ELISA Kit	Tianjing Anoric Bio-techology CO.Itd	pg/mL	212.35±29.76	241.89±108.45	435.67±107.07	220.0±21.55	0.744	<0.001	0.719	0.005	0.744	<0.001
Interleukin – 1β	IL-1β	Rat-IL-1beta ELISA Kit	Tianjing Anoric Bio-techology CO.Itd	pg/mL	56.13±31.4	93.48±23.79	77.67±48.81	34.11±16.05	0.052	0.497	0.183	0.348	<0.001	0.087
Tumor necrosis factor alpha	TNF－α	Rat-TNF alpha ELISA Kit	Tianjing Anoric Bio-techology CO.Itd	pg/mL	461.37±134.61	199.66±59.41	210.76±39.78	236.93±22.82	0.001	0.005	0.006	0.256	0.033	0.079
Urinary urea nitrogen	UUN	Urea Assay Kit	Nanjing Jiancheng Bioengineering Institute	mmol/L	52.75±8.1	40.52±15.97	36.91±14.16	40.63±4.14	0.226	0.04	0.005	0.821	0.821	0.842
Urinary albumin	U-ALB	Urine micro albumin assay kit	Nanjing Jiancheng Bioengineering Institute	g/L	14.65±4.91	3.51±2.05	10.48±2.82	0.37±0.14	<0.001	0.053	<0.001	<0.001	<0.001	<0.001
Urinary creatinine	Ucr	Creatinine Assay Kit	Nanjing Jiancheng Bioengineering Institute	mol/L	9244.06±2916.43	6196.04±2382.81	18124.96±6398.78	24498.7±5316.88	0.019	0.001	0.001	0.001	0.001	0.045
Urinary protein	U-pro	Urine protein test kit	Nanjing Jiancheng Bioengineering Institute	mg/L	814.75±119.1	642.29±163.87	663.9±179.8	253.89±30.31	0.033	0.095	0.001	0.791	0.001	0.001
					Mean ± SD				p value
Blood cells	Abbreviation	Machine	Source		CKD	JPYS	PF	Sham	JPYS vs. CKD	PF vs. CKD	Sham vs. CKD	PF vs. JPYS	Sham vs. JPYS	Sham vs. PF
White blood cell	WBC	ADVIA 2121i hematology analyzer	SIEMENS	10^9/ L	8.05±3.09	8.07±3.72	11.7±3.27	6.72±3.37	0.842	0.058	0.726	0.058	0.726	0.034
Red blood cell	RBC	ADVIA 2121i hematology analyzer	SIEMENS	10^12/ L	7.39±0.94	8.12±0.84	7.4±0.62	8.97±0.45	0.213	0.744	0.002	0.123	0.044	0.001
Hemoglobin	HGB	ADVIA 2121i hematology analyzer	SIEMENS	g/dL	12.84±1.53	13.79±0.99	12.63±1.01	15.46±1.04	0.144	0.774	0.006	0.012	0.007	0.003
Hematocrit	HCT	ADVIA 2121i hematology analyzer	SIEMENS	%	40.82±4.68	43.58±3.28	39.7±3.25	48.89±3.75	0.135	0.462	0.002	0.017	0.017	0.001
Mean corpusular volum	MCV	ADVIA 2121i hematology analyzer	SIEMENS	fL	55.38±2.0	53.85±2.05	53.71±1.39	54.48±2.47	0.369	0.369	0.369	0.967	0.967	0.967
Mean corpusular hemoglobin	MCH	ADVIA 2121i hematology analyzer	SIEMENS	Pg	17.42±0.58	17.04±0.74	17.07±0.5	17.23±0.64	0.755	0.755	0.803	0.935	0.803	0.935
Mean corpusular hemoglobin concerntration	MCHC	ADVIA 2121i hematology analyzer	SIEMENS	g/dL	31.43±0.32	31.63±0.29	31.83±0.65	31.61±0.81	0.275	0.269	0.712	0.275	0.712	0.712
Platelet	PLT	ADVIA 2121i hematology analyzer	SIEMENS	10^9/ L	1171.89±206.1	1130.5±167.71	1239.9±254.56	856.67±132.47	0.78	0.78	0.006	0.472	0.006	0.006
Neutrophil（%）	NEUT%	ADVIA 2121i hematology analyzer	SIEMENS	%	22.83±8.62	22.96±7.61	21.25±3.93	20.52±8.62	1	1	0.728	1	0.894	0.728
Lymphocyte（%）	LYM%	ADVIA 2121i hematology analyzer	SIEMENS	%	71.09±9.58	71.34±8.09	74.26±4.32	74.0±10.38	0.968	0.793	0.67	0.67	0.67	0.67
Monocyte（%）	MONO%	ADVIA 2121i hematology analyzer	SIEMENS	%	2.87±1.44	2.42±0.51	2.61±0.58	2.12±0.94	0.902	0.892	0.501	0.816	0.389	0.389
Eosimophil （%）	EOS%	ADVIA 2121i hematology analyzer	SIEMENS	%	2.94±1.36	2.96±1.55	1.62±0.46	2.54±1.06	0.774	0.027	0.713	0.027	0.713	0.081
Basophils（%）	BASO%	ADVIA 2121i hematology analyzer	SIEMENS	%	0.28±0.28	0.34±0.22	0.27±0.17	0.83±0.39	0.607	0.706	0.01	0.612	0.01	0.005
Reticulocyte	RET	ADVIA 2121i hematology analyzer	SIEMENS	10^9/ L	307.57±84.42	215.59±22.96	249.69±64.31	239.34±46.1	0.013	0.118	0.118	0.118	0.427	0.905
Reticulocyte（%）	RET%	ADVIA 2121i hematology analyzer	SIEMENS	%	4.31±1.67	2.69±0.44	3.4±0.95	2.67±0.46	0.007	0.111	0.007	0.066	0.837	0.066

## Sheet: Table S3
Primers	Forward primer	Reverse primer	Reference
JPYSClostri	GCTTAACTTGGGTGCTGCAT	CCTTCGCCACTGGTGTTCTT	This study
JPYSMetha	GGTACTCCCAGGGTAGAGGT	CCCTAGCTTTCGTCCCTCAC	This study
JPYSRumi2	CGGATGGGCAAGTCTGATGT	ACGCATTTCACCGCTACACT	This study
JPYSPhasco	CTCAACCCCGTATGGCTCTG	GCGTCAGACACAGTCCAGAA	This study
g-Encoc	ATCAGAGGGGGATAACACTT	ACTCTCATCCTTGTTCTTCTC	1
qPCRuni16S	CCATGAAGTCGGAATCGCTAG	GCTTGACGGGCGGTGT	2
References:
1. Matsuda, K., H. Tsuji, T. Asahara, K. Matsumoto, T. Takada, and K. Nomoto. 2009. Establishment of an analytical system for the human fecal microbiota, based on reverse transcription-quantitative PCR targeting of multicopy rRNA molecules. Appl. Environ. Microbiol. 75:1961-1969.
2.Ramseier,C.A.etal.Identificationofpathogenandhost-responsemarkers correlated with periodontal disease. J. Periodontol. 80, 436–446 (2009).

## Sheet: Table S4
	Mean±SD				p value
	Sham	CKD	PF	JPYS	PF vs. CKD	JPYS vs. CKD	Sham vs. CKD	Sham vs. PF	Sham vs. JPYS	PF vs. JPYS
Actinobacteria	0.0300 ± 0.0171	0.0712 ± 0.0381	0.1093 ± 0.0919	0.0365 ± 0.0245	0.427478	0.0258178	0.0212258	0.00246812	0.842105	0.00863842
Bacteroidetes	0.0066 ± 0.0045	0.0073 ± 0.0051	0.0073 ± 0.0088	0.0214 ± 0.0471	0.904826	0.904826	0.904826	0.904826	0.904826	0.904826
Euryarchaeota	0.0506 ± 0.0334	0.2469 ± 0.1331	0.1627 ± 0.1539	0.1317 ± 0.1378	0.234601	0.225508	0.00740436	0.160428	0.528849	0.528849
Fusobacteria	0.0000 ± 0.0000	0.0002 ± 0.0004	0.0000 ± 0.0001	0.0000 ± 0.0000	0.382629	0.275783	0.203164	0.382629	0.47889	0.584249
Proteobacteria	0.0004 ± 0.0008	0.0250 ± 0.0478	0.0006 ± 0.0009	0.0012 ± 0.0015	0.0158721	0.11834	0.0158721	0.538504	0.0158721	0.145302
Verrucomicrobia	0.0000 ± 0.0000	0.0051 ± 0.0153	0.0000 ± 0.0001	0.0000 ± 0.0001	0.59227	0.59227	0.385951	0.385951	0.385951	0.956883
Candidatus_Saccharibacteria	0.0003 ± 0.0002	0.0002 ± 0.0001	0.0004 ± 0.0002	0.0004 ± 0.0002	0.485613	0.485613	0.876528	0.485613	0.534348	0.911797
Firmicutes	0.8899 ± 0.0476	0.6329 ± 0.0907	0.7004 ± 0.1588	0.7950 ± 0.1515	0.218779	0.0440365	0.000246812	0.00896317	0.315378	0.157684
Others	0.0222 ± 0.0106	0.0111 ± 0.0079	0.0192 ± 0.0154	0.0137 ± 0.0051	0.364632	0.536361	0.146606	0.536361	0.364632	0.911797

## Sheet: Table S5
	Microbial feature (genus)	log2 Fold change compared with sham group	log2 Fold change compared with CKD group	Sham (mean ± sd)	CKD (mean ± sd)	PF (mean ± sd)	JPYS (mean ± sd)	Phylum	Family	Association with CKD disease in the literature(s)	TMAO producing	SCFA producing	Ref(s)
Disease biomarkers	Methanobrevibacter	2.3143		0.0496 ± 0.033	0.2466 ± 0.1331	0.1625 ± 0.1538	0.1314 ± 0.1378	Euyarchaeota	Methanobacteriaceae
	Corynebacterium	3.8706		0.0004 ± 0.0003	0.0063 ± 0.019	0.0001 ± 0.0001	0 ± 0.0001	Actinobacteria	Corynebacteriaceae	↑ (human)			1
	Christensenella			0 ± 0	0.0003 ± 0.0004	0.0001 ± 0.0002	0.0002 ± 0.0003	Firmicutes	Christensenellaceae
	Dietzia			0.0001 ± 0.0001	0 ± 0	0 ± 0	0 ± 0	Actinobacteria	Dietziaceae
	Lactobacillus	-2.8493		0.487 ± 0.1313	0.0676 ± 0.0425	0.1411 ± 0.1137	0.1972 ± 0.2015	Firmicutes	Lactobacillaceae	↓ (human and rats)		+	2,3,7
	Kocuria	-1.7061		0.0021 ± 0.001	0.0007 ± 0.002	0 ± 0	0 ± 0	Actinobacteria	Micrococcaceae
	Collinsella	3.5615		0.0019 ± 0.0052	0.0225 ± 0.0216	0.0313 ± 0.0525	0.0098 ± 0.0108	Actinobacteria	Coriobacteriaceae	↓ (human)			4
	Olsenella	5.0008		0 ± 0.0001	0.0009 ± 0.0011	0.0033 ± 0.0045	0.0005 ± 0.0005	Actinobacteria	Coriobacteriaceae	↑ (human )			5
	Lactococcus	10.8638		0 ± 0	0.0104 ± 0.0276	0.0002 ± 0.0005	0.0007 ± 0.0016	Firmicutes	Streptococcaceae	↑ (human )			5
	Clostridium_sensu_stricto	1.8076		0.0061 ± 0.0047	0.0213 ± 0.0149	0.0322 ± 0.0136	0.0133 ± 0.0042	Firmicutes	Clostridiaceae_1	↑ (human )	+	+	5,6,7
	Blautia	2.0185		0.0132 ± 0.0167	0.0534 ± 0.0328	0.0236 ± 0.0304	0.0596 ± 0.0242	Firmicutes	Lachnospiraceae	↓(human and rats)		+	8,9,7
	Ruminococcus2	3.5211		0.0005 ± 0.0015	0.0057 ± 0.005	0.003 ± 0.0057	0.005 ± 0.0024	Firmicutes	Lachnospiraceae			+	7
	Enterococcus	6.4676		0.0001 ± 0.0001	0.0094 ± 0.0231	0.0004 ± 0.0006	0.0001 ± 0.0001	Firmicutes	Enterococcaceae	↑ (human)			10
	Intestinimonas	2.4903		0.0003 ± 0.0004	0.0018 ± 0.0015	0.0028 ± 0.006	0.0007 ± 0.0004	Firmicutes	Lachnospiraceae	↑ (rats)		+	8,7
	Methanosphaera	-1.584		0.001 ± 0.0006	0.0003 ± 0.0005	0.0002 ± 0.0004	0.0003 ± 0.0002	Euyarchaeota	Methanobacteriaceae
	Weissella			0 ± 0	0.0009 ± 0.0018	0 ± 0	0 ± 0	Firmicutes	Leuconostocaceae	↑ (human)			4
PF biomarkers	Clostridium_III	-2.1866	-3.0692	0.0003 ± 0.0005	0.0005 ± 0.0006	0.0001 ± 0.0001	0.0003 ± 0.0004	Firmicutes	Clostridiaceae_1		+	+	11,7
	Rothia	-0.0724	2.7345	0.0002 ± 0.0002	0 ± 0	0.0002 ± 0.0002	0 ± 0	Actinobacteria	Micrococcaceae	↑ (human)			12
	Faecalibacterium	-1.1519	-6.8856	0 ± 0.0001	0.0012 ± 0.003	0 ± 0	0 ± 0.0001	Firmicutes	Ruminococcaceae	↓ (human)		+	13,7
	Romboutsia	0.4541	1.6054	0.0492 ± 0.0268	0.0222 ± 0.0155	0.0674 ± 0.0521	0.0255 ± 0.0159	Firmicutes	Clostridiaceae_1	↓ (human)	+	+	4,7
	Bifidobacterium	2.3447	1.6619	0.0084 ± 0.0109	0.0135 ± 0.0114	0.0427 ± 0.0439	0.0101 ± 0.0083	Actinobacteria	Bifidobacteriaceae	↓ (human and rat)		+	10,14,7
	Clostridium_sensu_stricto	2.4026	0.5949	0.0061 ± 0.0047	0.0213 ± 0.0149	0.0322 ± 0.0136	0.0133 ± 0.0042	Firmicutes	Clostridiaceae_1	↑ (human and rats)	+	+	5,6,7
	Blautia	0.8413	-1.1772	0.0132 ± 0.0167	0.0534 ± 0.0328	0.0236 ± 0.0304	0.0596 ± 0.0242	Firmicutes	Lachnospiraceae	↓(human and rats)		+	8,9,7
	Ruminococcus2	2.606	-0.9152	0.0005 ± 0.0015	0.0057 ± 0.005	0.003 ± 0.0057	0.005 ± 0.0024	Firmicutes	Lachnospiraceae			+	7
	Weissella			0 ± 0	0.0009 ± 0.0018	0 ± 0	0 ± 0	Firmicutes	Leuconostocaceae	↑ (human)			4
JPYS biomarkers	Coprococcus	3.8924	-0.2054	0 ± 0.0001	0.0008 ± 0.0011	0.0001 ± 0.0003	0.0007 ± 0.0004	Firmicutes	Lachnospiraceae	↓ (human)		+	4.10,7
	Clostridium_Xl		-3.0035	0 ± 0	0.0004 ± 0.0004	0 ± 0	0 ± 0.0001
	Clostridium_XlVb	8.0082	5.424	0 ± 0	0 ± 0.0001	0 ± 0.0001	0.0014 ± 0.004	Firmicutes	Clostridiaceae_1			+	7
	Parasutterella	1.5141	1.6948	0.0001 ± 0.0001	0.0001 ± 0.0001	0 ± 0.0001	0.0003 ± 0.0003	Proteobacteria	Sutterellaceae	↓ (human)			5,10
	Phascolarctobacterium	0.8817	1.9339	0.0157 ± 0.0208	0.0076 ± 0.0045	0.011 ± 0.0114	0.0289 ± 0.02	Firmicutes	Clostridiaceae_1	↑ (human)	+	+	15,7
	Enterococcus	-0.5927	-7.0603	0.0001 ± 0.0001	0.0094 ± 0.0231	0.0004 ± 0.0006	0.0001 ± 0.0001	Firmicutes	Enterococcaceae	↑ (human)			10
	Intestinimonas	1.0219	-1.4684	0.0003 ± 0.0004	0.0018 ± 0.0015	0.0028 ± 0.006	0.0007 ± 0.0004	Firmicutes	Lachnospiraceae	↑ (rats)		+	8,7
	Methanosphaera	-1.7154	-0.1314	0.001 ± 0.0006	0.0003 ± 0.0005	0.0002 ± 0.0004	0.0003 ± 0.0002	Euyarchaeota	Methanobacteriaceae
	Weissella			0 ± 0	0.0009 ± 0.0018	0 ± 0	0 ± 0	Firmicutes	Leuconostocaceae	↑ (human)			4
+: Possitive correlation
—: no significant change
PF&CKD
JPYS&CKD
All
References:
1.Xu, Kai-Yu, et al. "Impaired renal function and dysbiosis of gut microbiota contribute to increased trimethylamine-N-oxide in chronic kidney disease patients." Scientific reports 7.1 (2017): 1445.
2.Vaziri, N. D. et al. Chronic kidney disease alters intestinal microbial flora. Kidney Int. 83, 308–315 (2013).
3.Fukuuchi, F. et al. Intestinal bacteria-derived putrefactants in chronic renal failure. Clin. Exp. Nephr. 6, 99–104 (2002).
4.Lun, Hengzhong, et al. "Altered gut microbiota and microbial biomarkers associated with chronic kidney disease." MicrobiologyOpen 8.4 (2019): e00678.
5.Li, FengXia, et al. "Alterations to the Gut Microbiota and Their Correlation With Inflammatory Factors in Chronic Kidney Disease." Frontiers in Cellular and Infection Microbiology 9 (2019): 206.
6.Hoyles, Lesley, et al. "Metabolic retroconversion of trimethylamine N-oxide and the gut microbiota." Microbiome 6.1 (2018): 73.
7.Koh, Ara, et al. "From dietary fiber to host physiology: short-chain fatty acids as key bacterial metabolites." Cell 165.6 (2016): 1332-1345.
8.Chen, Lin, et al. "Unilateral ureteral obstruction causes gut microbial dysbiosis and metabolome disorders contributing to tubulointerstitial fibrosis." Experimental & molecular medicine 51.3 (2019): 38.
9.Stadlbauer, Vanessa, et al. "Structural and functional differences in gut microbiome composition in patients undergoing haemodialysis or peritoneal dialysis." Scientific reports 7.1 (2017): 15601.
10.Jiang, S. et al. Alteration of the gut microbiota in Chinese population with chronic kidney disease. Sci. Rep. 7, 2870 (2017).
11.Rath, Silke, et al. "Uncovering the trimethylamine-producing bacteria of the human gut microbiota." Microbiome 5.1 (2017): 54.
12.Yue, Qi, et al. "Carious status and supragingival plaque microbiota in hemodialysis patients." PloS one 13.10 (2018): e0204674.
13.Jiang, Shuanghong, et al. "A reduction in the butyrate producing species Roseburia spp. and Faecalibacterium prausnitzii is associated with chronic kidney disease progression." Antonie Van Leeuwenhoek 109.10 (2016): 1389-1396.
14.Iwashita, Yuko, et al. "Dietary changes involving Bifidobacterium longum and other nutrients delays chronic kidney disease progression." American journal of nephrology 47.5 (2018): 325-332.
15.Xu, Kai-Yu, et al. "Impaired renal function and dysbiosis of gut microbiota contribute to increased trimethylamine-N-oxide in chronic kidney disease patients." Scientific reports 7.1 (2017): 1445.
